# Supplementary material
Source: PubMed Central journal article supplement (PMC7544641)
Supplement: NIHMS1619429-supplement-2.pdf [file NIHMS1619429-supplement-2.pdf]

## Supplemental Information

### Figure S1

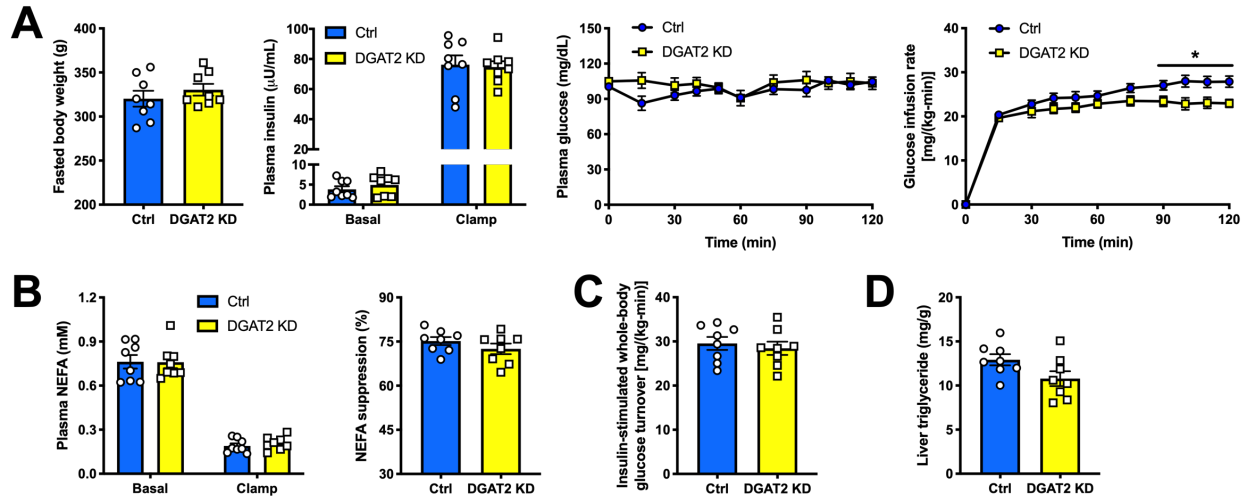

**Figure S1. Related to Figure 1**

(A) Fasted body weight, fasting and clamp insulin levels, plasma glucose and glucose infusion rate during hyperinsulinemic-euglycemic clamp in Ctrl vs DGAT2 KD rats.

(B) Plasma NEFA and its suppression by insulin during clamp.

(C) Insulin-stimulated whole-body glucose turnover during clamp.

(D) Liver triglyceride content in Ctrl vs DGAT2 KD rats.

In all panels, data are the mean  $\pm$  S.E.M. of  $n = 8$  per group.

# Figure S2

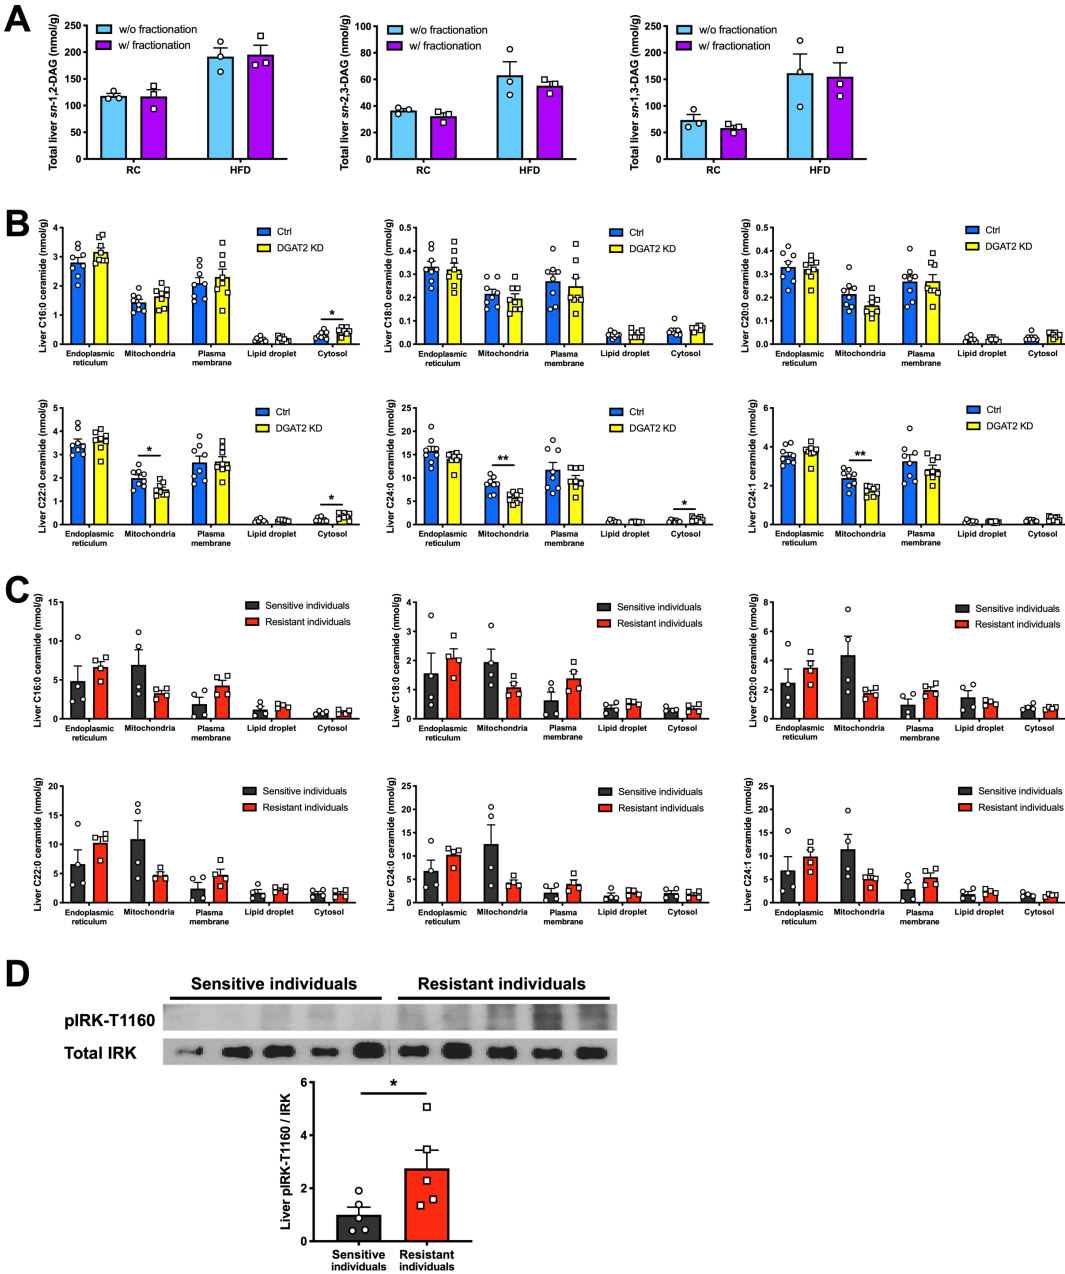

**Figure S2. Related to Figure 2**

(A) Liver DAG stereoisomer content measured with and without the fractionation method to determine the lipid content recovery of the fractionation method.

(B) and (C) Liver ceramide species content in five subcellular compartments.

(D) Human liver IRK-T1160 phosphorylation as measured by western blot (top) and with its quantification (bottom).

In all panels, data are the mean±S.E.M. In (A),  $n = 3$  per group. In (B),  $n = 8$  per group. In (C),  $n = 4$  per group. In (D),  $n = 5$  per group. \* $P < 0.05$  and \*\* $P < 0.01$ .

# Figure S3

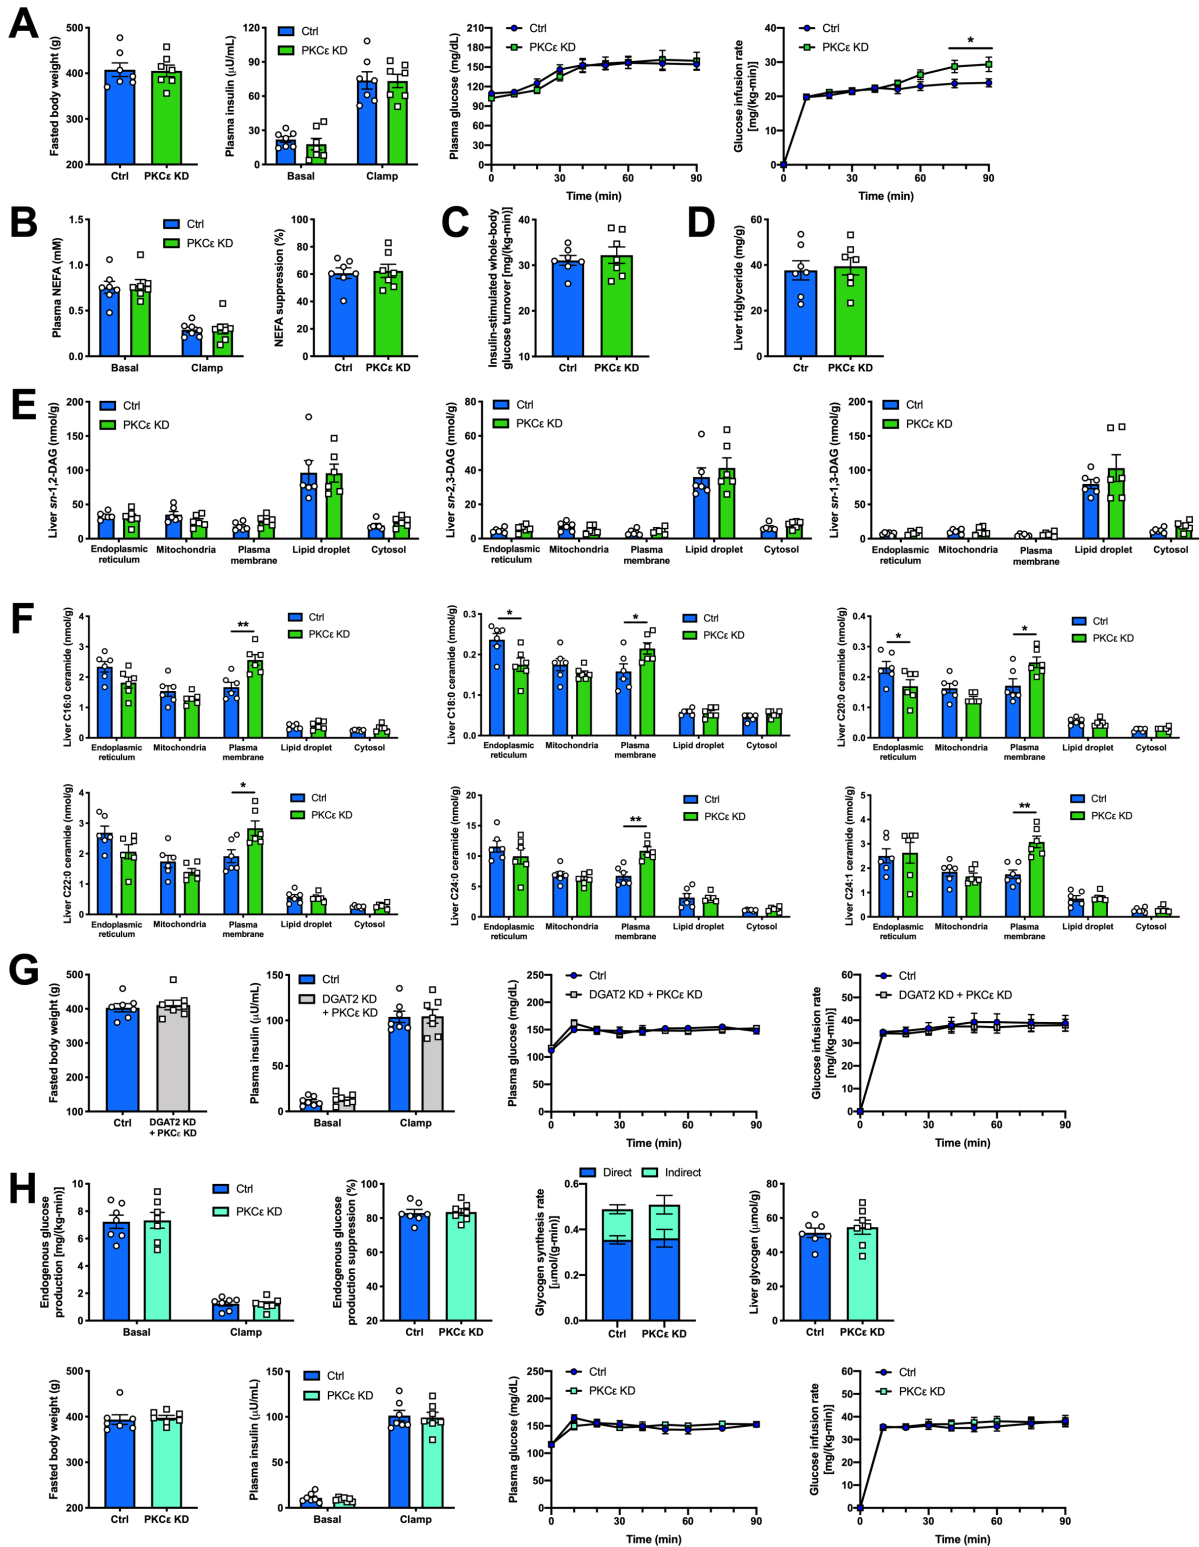

**Figure S3. Related to Figure 3**

(A) Fasted body weight, fasting and clamp insulin levels, plasma glucose and glucose infusion rate during clamp in HFD-fed Ctrl vs hepatic PKC $\epsilon$  KD rats.

(B) Plasma NEFA and its suppression by insulin during clamp in HFD-fed Ctrl vs hepatic PKC $\epsilon$  KD rats.

(C) Insulin-stimulated whole-body glucose turnover during clamp in HFD-fed Ctrl vs hepatic PKC $\epsilon$  KD rats.

(D) Liver triglyceride content in HFD-fed Ctrl vs hepatic PKC $\epsilon$  KD rats.

(E) Liver DAG stereoisomer content in five subcellular compartments in HFD-fed Ctrl vs hepatic PKC $\epsilon$  KD rats.

(F) Liver ceramide species content in five subcellular compartments in HFD-fed Ctrl vs hepatic PKC $\epsilon$  KD rats.

(G) Fasted body weight, fasting and clamp insulin levels, plasma glucose and glucose infusion rate during clamp in Ctrl vs hepatic DGAT2 + PKC $\epsilon$  KD rats.

(H) EGP, EGP's suppression by insulin and hepatic glycogen synthesis rate during a hyperinsulinemic-hyperglycemic clamp and post-clamp hepatic glycogen content, fasted body weight, fasting and clamp insulin levels, plasma glucose and glucose infusion rate during clamp in regular chow diet-fed Ctrl vs hepatic PKC $\epsilon$  KD rats.

In all panels, data are the mean $\pm$ S.E.M. In (E) and (F),  $n = 6$  per group. In all the other panels,  $n = 7$  per group. \* $P < 0.05$  and \*\* $P < 0.01$ .

# Figure S4

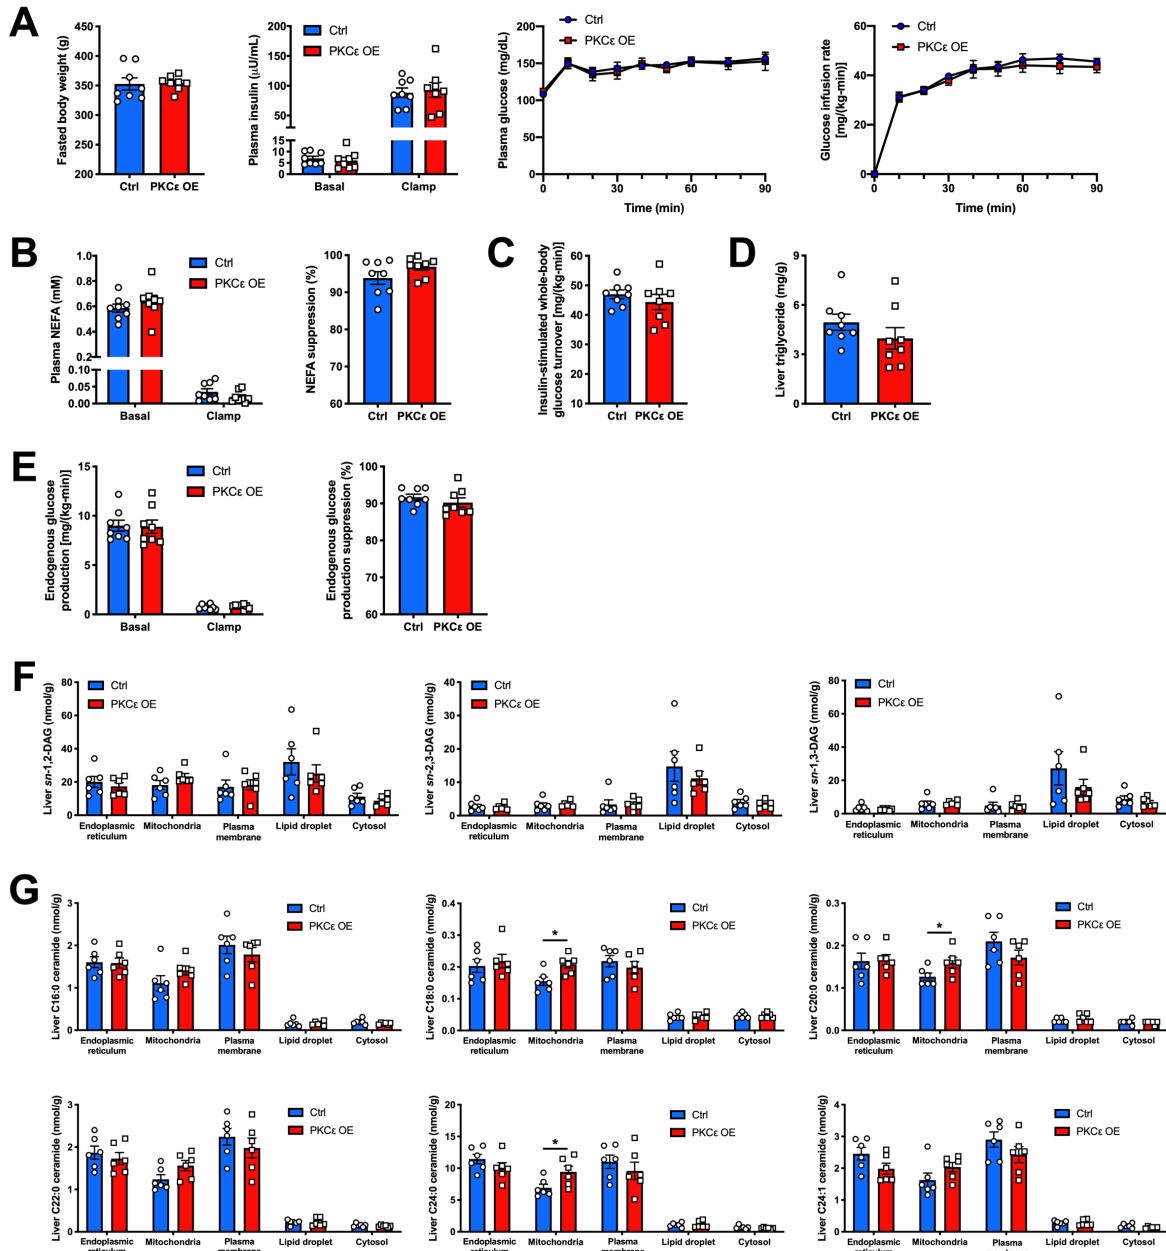

**Figure S4. Related to Figure 4**

- (A) Fasted body weight, fasting and clamp insulin levels, plasma glucose and glucose infusion rate during clamp in Ctrl vs hepatic PKC $\epsilon$  OE rats.
- (B) Plasma NEFA and its suppression by insulin during clamp.
- (C) Insulin-stimulated whole-body glucose turnover during clamp.
- (D) Liver triglyceride in Ctrl vs hepatic PKC $\epsilon$  OE rats.
- (E) EGP and its suppression by insulin during clamp.
- (F) Liver DAG stereoisomer content in five subcellular compartments in Ctrl vs hepatic OE rats.
- (G) Liver ceramide species content in five subcellular compartments in Ctrl vs hepatic OE rats.

In all panels, data are the mean $\pm$ S.E.M. In (F) and (G),  $n = 6$  per group. In all the other panels,  $n = 8$  per group. \* $P < 0.05$ .

# Table S1

|                                               | Hepatic Insulin Sensitive |      | Hepatic Insulin Resistant |      | <i>P</i> |
|-----------------------------------------------|---------------------------|------|---------------------------|------|----------|
|                                               | mean                      | SD   | mean                      | SD   |          |
| Women/men (n)                                 | 4/4                       | -    | 2/5                       | -    | -        |
| Age (years)                                   | 49                        | 14   | 51                        | 10   | 0.347    |
| BMI (kg/m <sup>2</sup> )                      | 40.6                      | 4.5  | 50.1                      | 7.7  | 0.011    |
| Body fat content (%)                          | 43                        | 6    | 47                        | 8    | 0.292    |
| Liver fat content (%)                         | 3.6                       | 1.3  | 16.2                      | 5.8  | 0.001    |
| Fasting plasma glucose (mmol/L)               | 4.7                       | 0.3  | 5.9                       | 0.7  | 0.001    |
| Fasting plasma insulin (pmol/L)               | 100                       | 36   | 221                       | 49   | <0.001   |
| Fasting plasma triglycerides (%)              | 1.36                      | 0.47 | 1.60                      | 0.77 | 0.482    |
| Basal EGP (μmol/kg/min)                       | 7.1                       | 0.9  | 7.5                       | 0.9  | 0.377    |
| Insulin-mediated EGP suppression (% of basal) | 81                        | 7    | 55                        | 5    | <0.001   |
| Insulin-stimulated glucose Rd (% of basal)    | 506                       | 137  | 232                       | 67   | <0.001   |

**Table S1. Baseline characteristics of human subjects, Related to Figure 2**
